# Supplementary material for: Self-assembly and phase behaviour of PEI : cationic surfactant aqueous mixtures forming mesostructured films at the air/solution interface
Source: Royal Society of Chemistry journal article supplement (doi:10.1039/c3sm27541h), 2013-01-01

## Supporting Information

# Self-assembly and phase behaviour of PEI:cationic surfactant aqueous mixtures forming mesostructured films at the air/solution interface

Hansel Comas-Rojas,<sup>a</sup> Carlos Enríquez-Victorero,<sup>a</sup> Stephen J. Roser,<sup>b</sup> Karen J. Edler\*<sup>b</sup>  
and Aurora Pérez-Gramatges<sup>a‡</sup>

Figure S1. Surface tension profiles of the surfactants CPC, CPB and CTAB

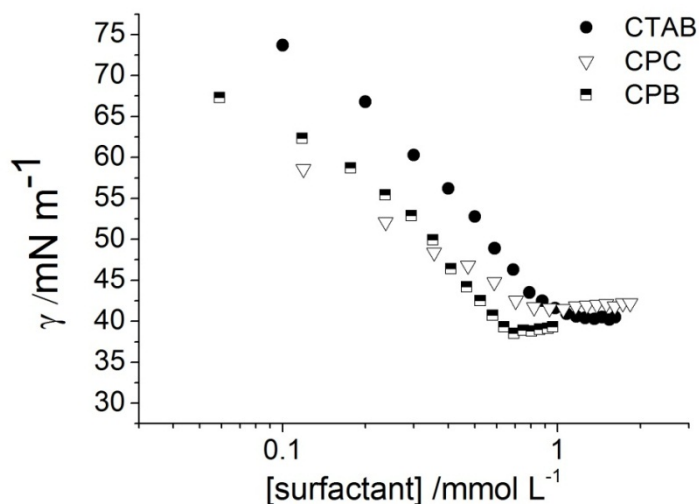

Figure S2. Surface tension profile of polyelectrolyte PEI

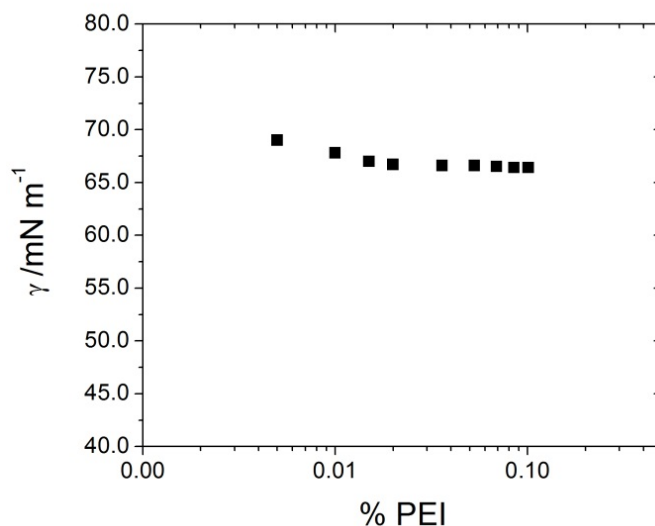

Figure S3. Surface tension profile of the 0.5% PEI:CTAB mixture from direct measurements at pre-mixed compositions.

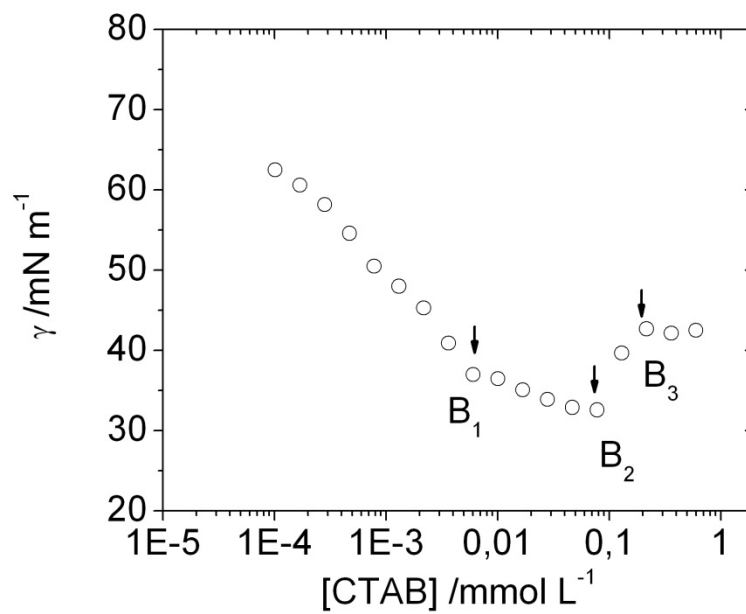

Figure S4. Surface tension profiles at several % PEI of the surfactants CPC, CPB and CTAB. Pure surfactants (filled squares), 0.1% (empty inverted triangle), 0.5% (empty triangle) and 1.0% (empty circle).

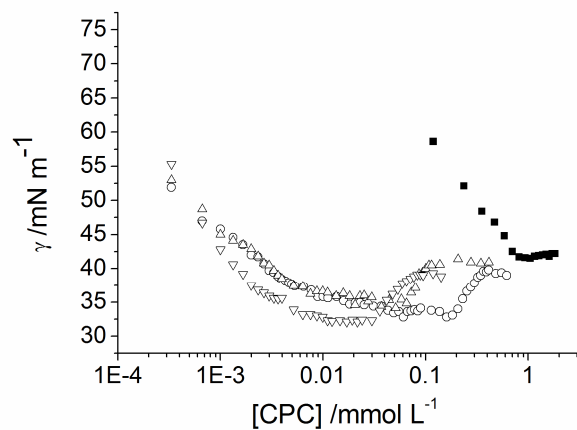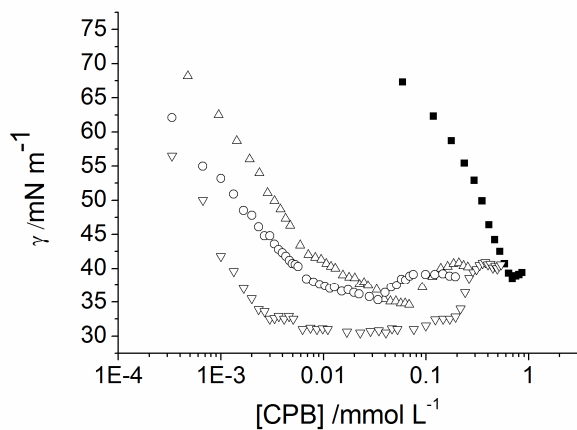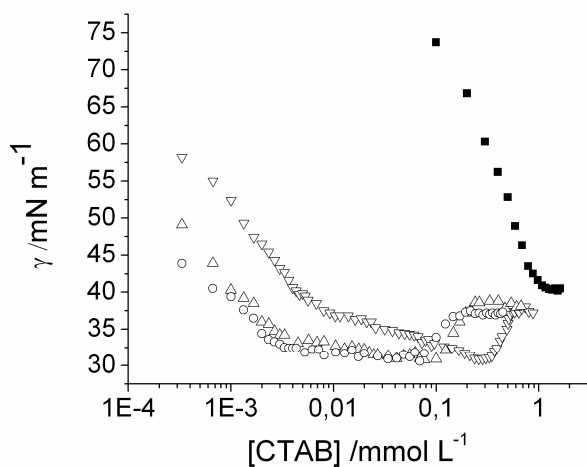

Figure S5. Small angle X-ray scattering (SAXS) profiles and corresponding fittings of the bulk solutions of CPC and CPB surfactants. Compositions were 0.005 and 0.1 mmol L<sup>-1</sup> at 0.5% PEI. Data is shown by lines and + markers, solid lines represent the model fitted.

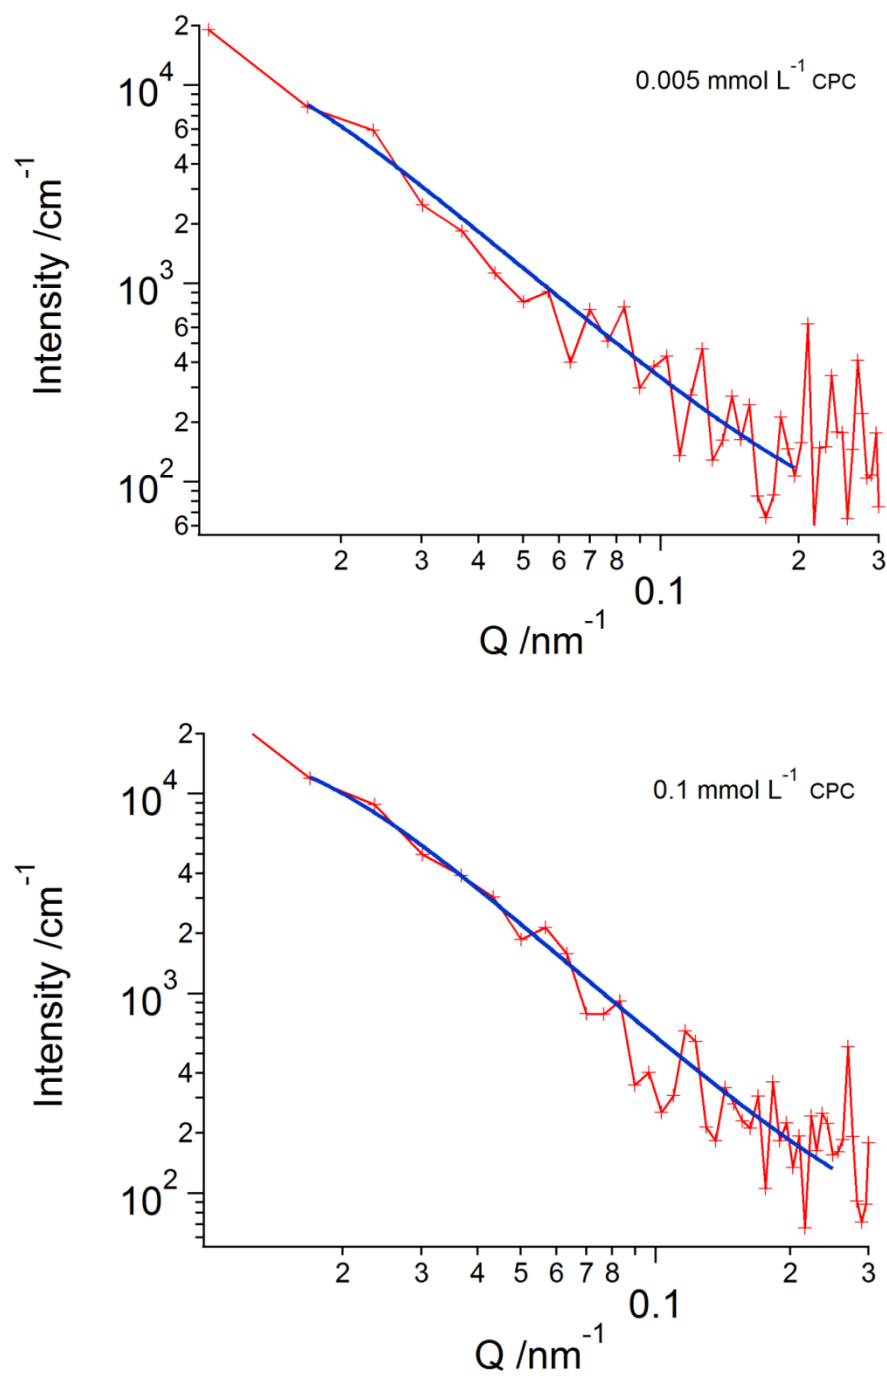

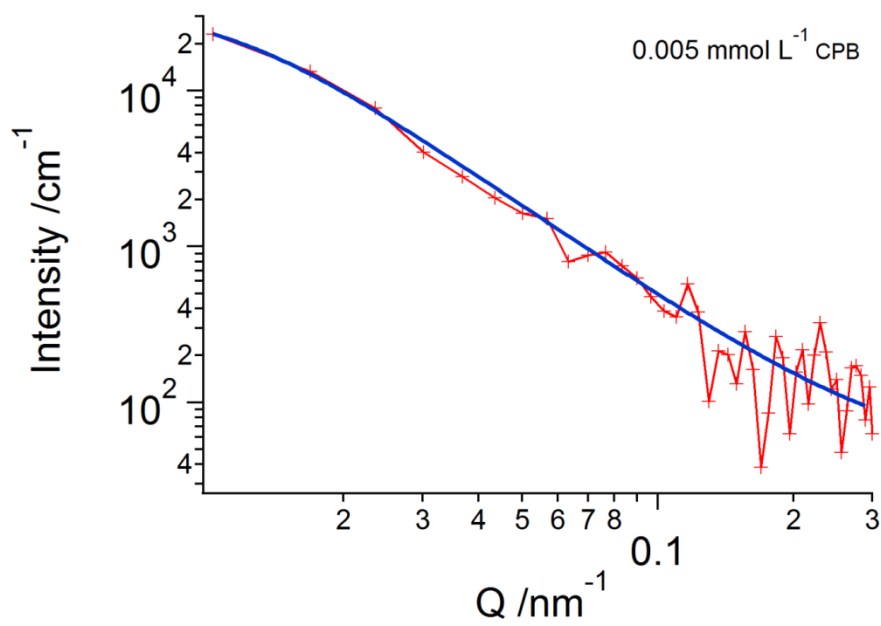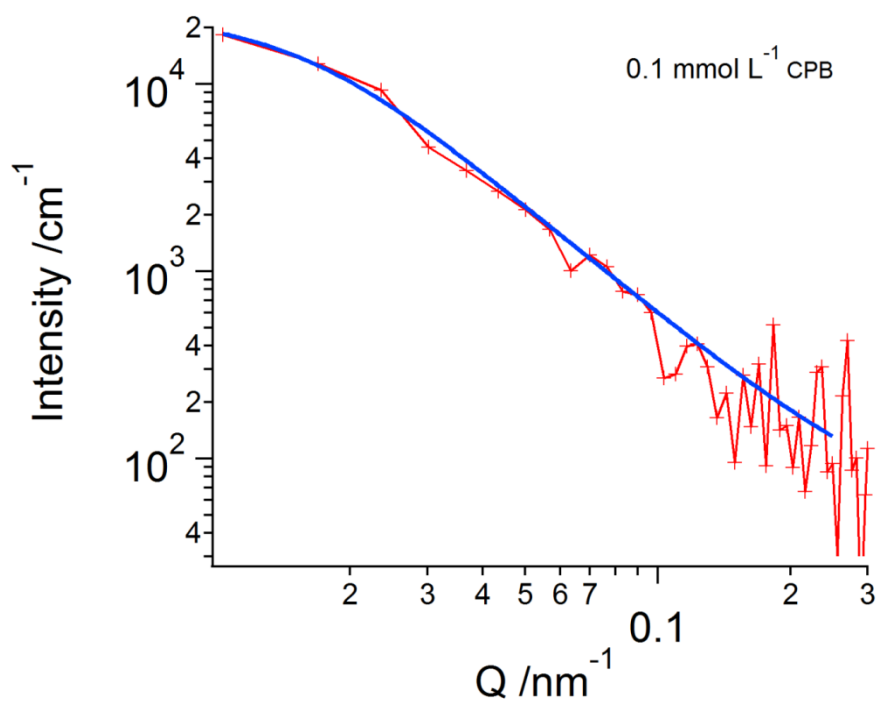

Supplement: c3sm27541h.pdf [file c3sm27541h.pdf]
